# Supplementary material
Source: HighWire-hosted journal article supplement (doi:10.1101/rna.079747.123)
Supplement: Supplemental_Material.docx [file Supplemental_Material.docx]

**Supplementary Information**

**Supplemental Figure 1: Example of VODKA Catalog Generation.** A) Schematic for VODKA2 delVG database generation. B) Schematic for VODKA2 cbVG database generation. C) Orientation and readout of cbVG junction in VODKA2 database.

**Supplemental Figure 2: Example of Species_ID Aggregation.** Species_ID pooling for delVG 17_32, delVG 18_33, delVG 19_34, and delVG 20_35, where the delVG read counts are summed and assigned to the mode species within the group.
