# Supplementary material
Source: HighWire-hosted journal article supplement (doi:10.1101/rna.079747.123)
Supplement: Supplemental_Table_1.pdf [file Supplemental_Table_1.pdf]

**Supplementary Table 1. Estimation of memory and storage requirements for the generation of VODKA2 DB**

|                                                      |       |       |       |       |       |
|------------------------------------------------------|-------|-------|-------|-------|-------|
| reference sequence length (equivalent to FASTA size) | 1KB   | 5KB   | 10KB  | 15KB  | 20KB  |
| number of B/R combinations (generated by VODKA2)     | 48M   | 12M   | 49M   | 112M  | 199M  |
| size of the multi-FASTA file (generated by VODKA2)   | 0.1GB | 3.7GB | 15GB  | 35GB  | 60GB  |
| total size of Bowtie2 index (estimation)             | 0.5GB | 10GB  | 30GB  | 80GB  | 140GB |
| Bowtie2-build memory usage (estimation)              | 2GB   | 50GB  | 200GB | 350GB | 400GB |
